# Supplementary material for: Trends in global early-onset liver cancer from 1990 to 2050: an analysis of the Global Burden of Disease Study 2021
Source: Research Square preprint supplement (doi:10.21203/rs.3.rs-8329191/v1), 2025-12-29
Supplement: Supplementary file 1 [file a23be3af1caaa58ef50cde18.docx]

**Table S1.** The number and ASR of early-onset liver cancer by global, SDI regions, WHO regions in 1990.

| **Location** | **Sex** | **Incidence** | | **Deaths** | | **DALYs** | |
| --- | --- | --- | --- | --- | --- | --- | --- |
| **Number (95%UI)** | **ASR (95%UI)** | **Number (95%UI)** | **ASR (95%UI)** | **Number (95%UI)** | **ASR (95%UI)** |
| Global | Male | 40115 (34792-46206) | 3.4 (2.9-4) | 35930 (31110-41442) | 3 (2.6-3.6) | 1790620 (1552184-2075416) | 148.6 (126.6-174.8) |
| Female | 11386 (9744-13129) | 1 (0.8-1.1) | 10231 (8752-11806) | 0.9 (0.7-1) | 525996 (450723-605853) | 44 (37.3-51.4) |
| Both | 51500 (45321-58434) | 2.2 (1.9-2.5) | 46162 (40613-52416) | 2 (1.7-2.3) | 2316615 (2037389-2629237) | 97.3 (84.5-112) |
| **SDI regions** |  |  |  |  |  |  |  |
| Low SDI | Male | 2106 (1401-3034) | 2.5 (1.6-3.6) | 1965 (1307-2840) | 2.3 (1.5-3.3) | 98020 (64825-142303) | 112.9 (73.3-163.1) |
| Female | 1038 (775-1458) | 1.2 (0.8-1.6) | 972 (728-1365) | 1.1 (0.8-1.5) | 51370 (38584-72075) | 54.9 (40-78.2) |
| Both | 3144 (2210-4359) | 1.8 (1.3-2.5) | 2938 (2075-4083) | 1.7 (1.2-2.4) | 149390 (105302-207701) | 84 (58.9-118) |
| Low-middle SDI | Male | 3118 (2586-4028) | 1.4 (1.1-1.8) | 2903 (2407-3736) | 1.3 (1-1.7) | 145340 (120702-186997) | 62.7 (50.3-83.4) |
| Female | 1606 (1354-2002) | 0.7 (0.6-0.9) | 1495 (1261-1859) | 0.7 (0.5-0.9) | 77890 (65962-96281) | 33.4 (27-43) |
| Both | 4725 (3997-5870) | 1 (0.9-1.3) | 4398 (3720-5456) | 1 (0.8-1.2) | 223229 (189715-276645) | 48.3 (40.1-61.7) |
| Middle SDI | Male | 17630 (14795-21321) | 4.7 (3.8-5.7) | 16066 (13457-19375) | 4.3 (3.4-5.2) | 808182 (678034-973237) | 209.9 (169.5-258.9) |
| Female | 4793 (3951-5651) | 1.3 (1.1-1.6) | 4384 (3631-5166) | 1.2 (1-1.5) | 225653 (187177-265944) | 60.4 (49-73.1) |
| Both | 22423 (19182-26132) | 3 (2.5-3.7) | 20450 (17524-23800) | 2.8 (2.3-3.3) | 1033834 (888457-1196807) | 137.4 (114.8-164.9) |
| High-middle SDI | Male | 11687 (9473-14188) | 4.6 (3.5-5.7) | 10550 (8518-12825) | 4.1 (3.2-5.2) | 524900 (425675-639465) | 201.8 (157.1-254.2) |
| Female | 2622 (2136-3206) | 1 (0.8-1.3) | 2357 (1923-2889) | 0.9 (0.7-1.2) | 120249 (98150-147706) | 46.8 (36.8-58.4) |
| Both | 14309 (11950-17010) | 2.8 (2.3-3.4) | 12907 (10766-15328) | 2.5 (2.1-3.1) | 645149 (539467-768997) | 125.3 (101.2-152.2) |
| High SDI | Male | 5560 (4905-6398) | 2.3 (2-2.8) | 4434 (3857-5160) | 1.8 (1.5-2.3) | 213583 (186586-246386) | 88.8 (73.9-109.3) |
| Female | 1321 (1220-1430) | 0.6 (0.5-0.7) | 1017 (936-1112) | 0.4 (0.4-0.5) | 50545 (46656-54920) | 21.6 (18.8-25.4) |
| Both | 6881 (6159-7759) | 1.4 (1.3-1.7) | 5451 (4816-6234) | 1.1 (1-1.4) | 264128 (234164-299652) | 55.5 (47.5-66.3) |
| **WHO regions** |  |  |  |  |  |  |  |
| African Region | Male | 2813 (1765-4168) | 3.3 (2.1-5) | 2622 (1648-3887) | 3.1 (1.9-4.6) | 132047 (82810-196551) | 152.4 (93.8-228.6) |
| Female | 1398 (1011-2037) | 1.6 (1.1-2.3) | 1304 (942-1903) | 1.5 (1-2.2) | 69224 (49995-100916) | 73.9 (52.3-109.9) |
| Both | 4210 (2846-6032) | 2.5 (1.6-3.5) | 3925 (2661-5625) | 2.3 (1.5-3.3) | 201270 (136599-288554) | 113.4 (76-164) |
| Eastern Mediterranean Region | Male | 760 (620-1052) | 1.1 (0.8-1.6) | 707 (577-982) | 1 (0.8-1.5) | 35313 (28909-48704) | 50.3 (37.1-72.4) |
| Female | 688 (522-945) | 1 (0.7-1.6) | 637 (484-875) | 1 (0.7-1.4) | 32798 (25150-44621) | 47.9 (33.7-70.9) |
| Both | 1448 (1158-1904) | 1.1 (0.8-1.5) | 1344 (1077-1769) | 1 (0.8-1.4) | 68111 (54830-89085) | 49.1 (37.3-66.5) |
| European Region | Male | 1740 (1669-1815) | 0.8 (0.8-0.9) | 1483 (1421-1547) | 0.7 (0.7-0.8) | 73183 (70237-76313) | 34.7 (32.7-37) |
| Female | 834 (804-867) | 0.4 (0.4-0.4) | 723 (695-752) | 0.3 (0.3-0.4) | 36492 (35145-37947) | 17.2 (16.2-18.2) |
| Both | 2574 (2496-2661) | 0.6 (0.6-0.6) | 2206 (2134-2279) | 0.5 (0.5-0.5) | 109674 (106338-113231) | 25.9 (24.8-27.2) |
| Region of the Americas | Male | 1045 (1018-1075) | 0.6 (0.6-0.7) | 791 (770-818) | 0.5 (0.5-0.5) | 39927 (38856-41299) | 24 (23-25.2) |
| Female | 633 (620-649) | 0.4 (0.4-0.4) | 519 (508-534) | 0.3 (0.3-0.3) | 26430 (25863-27164) | 15.4 (14.8-16.1) |
| Both | 1677 (1648-1708) | 0.5 (0.5-0.5) | 1310 (1286-1341) | 0.4 (0.4-0.4) | 66357 (65152-67827) | 19.7 (19.1-20.3) |
| South-East Asia Region | Male | 3512 (2980-4385) | 1.3 (1-1.6) | 3258 (2772-4061) | 1.2 (0.9-1.5) | 161247 (137613-200188) | 57.4 (46-74.3) |
| Female | 1274 (1053-1508) | 0.5 (0.4-0.6) | 1182 (972-1398) | 0.4 (0.4-0.5) | 61325 (50289-72873) | 22.3 (17.6-27.3) |
| Both | 4785 (4206-5589) | 0.9 (0.8-1.1) | 4440 (3896-5173) | 0.8 (0.7-1) | 222572 (196112-258236) | 40.5 (34.2-49) |
| Western Pacific Region | Male | 29901 (25021-35688) | 8 (6.6-9.7) | 26763 (22394-32063) | 7.2 (5.9-8.7) | 1333336 (1114863-1598421) | 351.2 (288.2-427.3) |
| Female | 6490 (5165-7818) | 1.8 (1.4-2.2) | 5807 (4623-7001) | 1.6 (1.3-2) | 296656 (236393-357762) | 81.7 (64-100.2) |
| Both | 36391 (30889-41900) | 5 (4.2-5.9) | 32570 (27628-37608) | 4.5 (3.8-5.3) | 1629992 (1383000-1877513) | 221 (184.7-262.6) |
| DALYs, the disability-adjusted life years; ASR, age-standardizedrate; SDI, socio-demographic index; WHO, world health organization. | | | | | | | |

**Table S2.** Projection of the ASIR in overall, male, and female early-onset liver cancer by different ages from 2022 to 2050.

| **year** | **ASIR** | | |
| --- | --- | --- | --- |
| **Overall** | **Male** | **Female** |
| 2022 | 1.77883929899529（1.7788384805644-1.77884011742618） | 2.7961701010314（2.79616868291281-2.79617151914999） | 0.763115261052318（0.763114964706673-0.763115557397963） |
| 2023 | 1.76187037651694（1.76186910062639-1.76187165240749） | 2.76674378996713（2.76674160854761-2.76674597138665） | 0.759576817283866（0.759576352755067-0.759577281812665） |
| 2024 | 1.74851447201751（1.74851262245505-1.74851632157997） | 2.74263459540175（2.74263145821252-2.74263773259098） | 0.757170176309926（0.757169505463045-0.757170847156807） |
| 2025 | 1.7394241868592（1.73942167671598-1.73942669700242） | 2.72507002259375（2.72506578680588-2.72507425838162） | 0.75603192070119（0.756031013433121-0.756032827969259） |
| 2026 | 1.73401267554613（1.7340094255723-1.73401592551996） | 2.71338314521804（2.71337768029432-2.71338861014176） | 0.756007981982689（0.756006810440259-0.756009153525119） |
| 2027 | 1.73169557829617（1.7316915081906-1.73169964840174） | 2.70715023595391（2.70714340795955-2.70715706394828） | 0.756819190441032（0.756817727401193-0.756820653480871） |
| 2028 | 1.73151628199679（1.73151132516916-1.73152123882442） | 2.70444201044246（2.70443371084295-2.70445031004197） | 0.758369866511906（0.758368088113714-0.758371644910098） |
| 2029 | 1.73269129302069（1.73268539063828-1.7326971954031） | 2.70340551298159（2.70339564909428-2.7034153768689） | 0.760558560307068（0.76055644429956-0.760560676314576） |
| 2030 | 1.73444519991095（1.73443829776392-1.73445210205798） | 2.70232761118521（2.7023161010869-2.70233912128352） | 0.763255616094103（0.763253140727784-0.763258091460422） |
| 2031 | 1.73579643778138（1.73578848412368-1.73580439143908） | 2.69939889976601（2.69938566832879-2.69941213120323） | 0.766252286572968（0.766249429990246-0.76625514315569） |
| 2032 | 1.73597425378441（1.73596519795549-1.73598330961333） | 2.69360015847952（2.69358513348725-2.69361518347179） | 0.769244784960356（0.769241525625499-0.769248044295213） |
| 2033 | 1.7341415266385（1.73413133276054-1.73415172051646） | 2.68333584172937（2.68331898110173-2.68335270235701） | 0.772050575117809（0.772046894009521-0.772054256226097） |
| 2034 | 1.72883350632701（1.72882215702558-1.72884485562844） | 2.66536945041353（2.66535075344014-2.66538814738692） | 0.774565547559195（0.774561427471986-0.774569667646404） |
| 2035 | 1.71855598586091（1.71854348417591-1.71856848754591） | 2.6363258931523（2.63630540691623-2.63634637938837） | 0.776789803365936（0.776785227892261-0.776794378839611） |
| 2036 | 1.70281979130782（1.7028061541422-1.70283342847344） | 2.59487063039991（2.59484843802862-2.5948928227712） | 0.778882541437151（0.7788774933314-0.778887589542902） |
| 2037 | 1.68270981899759（1.68269506365981-1.68272457433537） | 2.54323205419416（2.5432082446158-2.54325586377252） | 0.781002241406385（0.780996702028519-0.781007780784251） |
| 2038 | 1.66100391818075（1.66098805139445-1.66101978496705） | 2.48727134986689（2.48724598894196-2.48729671079182） | 0.783353529252855（0.783347479147486-0.783359579358224） |
| 2039 | 1.64068319077381（1.64066619644078-1.64070018510684） | 2.43242735251079（2.43240046561625-2.43245423940533） | 0.786365128602197（0.786358544745355-0.786371712459038） |
| 2040 | 1.62369117311295（1.62367301239138-1.62370933383452） | 2.38200049990972（2.38197207549348-2.38202892432596） | 0.790419096261583（0.790411950936571-0.790426241586595） |
| 2041 | 1.61041433497935（1.61039495604564-1.61043371391306） | 2.3366411006031（2.33661110853637-2.33667109266983） | 0.795699640030802（0.795691901242755-0.795707378818849） |
| 2042 | 1.60003060457948（1.60000995522744-1.60005125393152） | 2.29536817183505（2.29533658120047-2.29539976246963） | 0.802128825445676（0.802120458856564-0.802137192034788） |
| 2043 | 1.5927141470176（1.59269216803848-1.59273612599672） | 2.25948103048221（2.25944778642493-2.25951427453949） | 0.80955544608654（0.809546416662039-0.809564475511041） |
| 2044 | 1.58794340743402（1.58792004081963-1.58796677404841） | 2.22801110132297（2.22797615316591-2.22804604948003） | 0.817883838753601（0.81787411019523-0.817893567311972） |
| 2045 | 1.58493566447689（1.58491085783696-1.58496047111682） | 2.1991238996937（2.19908721650559-2.19916058288181） | 0.82702862175377（0.827018156271674-0.827039087235866） |
| 2046 | 1.58279058562395（1.58276429529376-1.58281687595414） | 2.17096944243076（2.17093101797732-2.1710078668842） | 0.836872083450155（0.836860842062812-0.836883324837498） |
| 2047 | 1.58082408470002（1.58079627431103-1.58085189508901） | 2.14268298500795（2.14264282551553-2.14272314450037） | 0.847231500680079（0.847219444261063-0.847243557099095） |
| 2048 | 1.57908547322293（1.57905610534629-1.57911484109957） | 2.11503345007071（2.1149915490795-2.11507535106192） | 0.857907494935449（0.857894585408665-0.857920404462233） |
| 2049 | 1.57773018787338（1.57769922100117-1.57776115474559） | 2.08844820603593（2.08840454712398-2.08849186494788） | 0.868814497820759（0.868800696790802-0.868828298850716） |
| 2050 | 1.57680566557945（1.57677305474563-1.57683827641327） | 2.06291874901843（2.06287331214705-2.06296418588981） | 0.879918202642777（0.879903470617073-0.879932934668481） |

ASIR, age-standardized incidence rate.

**Table S3.** Projection of the ASMR in overall, male, and female early-onset liver cancer by different ages from 2022 to 2050.

| **year** | **ASDR** | | |
| --- | --- | --- | --- |
| **Overall** | **Male** | **Female** |
| 2022 | 1.38371885752574（1.38371810687355-1.38371960817793） | 2.15525734596963（2.15525605769481-2.15525863424445） | 0.616036524000395（0.616036256259195-0.616036791741595） |
| 2023 | 1.36860803992305（1.36860686248512-1.36860921736098） | 2.12908592110325（2.12908392414597-2.12908791806053） | 0.61216499364617（0.612164569744843-0.612165417547497） |
| 2024 | 1.35807107619685（1.35806936158406-1.35807279080964） | 2.11020121263374（2.11019832445317-2.11020410081431） | 0.609416171797775（0.609415556794643-0.609416786800907） |
| 2025 | 1.34915672064094（1.34915439009395-1.34915905118793） | 2.09337739325171（2.09337348577431-2.09338130072911） | 0.607548520145555（0.607547686881589-0.607549353409521） |
| 2026 | 1.34136576599297（1.34136275137884-1.3413687806071） | 2.07798225420709（2.07797721757886-2.07798729083532） | 0.606430574906808（0.606429498587061-0.606431651226555） |
| 2027 | 1.33695103197357（1.33694726061255-1.33695480333459） | 2.06848067863751（2.06847439309964-2.06848696417538） | 0.606093686474294（0.606092342603953-0.606095030344635） |
| 2028 | 1.33597902853329（1.33597443525227-1.33598362181431） | 2.064616630446（2.06460899033404-2.06462427055796） | 0.606590147700865（0.606588514415912-0.606591780985818） |
| 2029 | 1.33631819299683（1.33631272244749-1.33632366354617） | 2.06229623076581（2.0622871503967-2.06230531113492） | 0.607718242524079（0.60771629952454-0.607720185523618） |
| 2030 | 1.33597232663393（1.33596593403667-1.33597871923119） | 2.05777571868823（2.05776513462669-2.05778630274977） | 0.6092071859138（0.60920491386085-0.60920945796675） |
| 2031 | 1.33445636867626（1.33444901307828-1.33446372427424） | 2.05017579082409（2.05016364926179-2.05018793238639） | 0.610892196296966（0.610889575904865-0.610894816689067） |
| 2032 | 1.3325966170384（1.3325882524156-1.3326049816612） | 2.04119499092869（2.04118122991346-2.04120875194392） | 0.612671065875106（0.612668077611929-0.612674054138283） |
| 2033 | 1.33002802998205（1.33001862021714-1.33003743974695） | 2.03004498059755（2.03002955966925-2.03006040152585） | 0.614446933425776（0.614443559634193-0.614450307217359） |
| 2034 | 1.32499626077443（1.32498578962268-1.32500673192618） | 2.01342920650172（2.01341212687937-2.01344628612407） | 0.616056864812999（0.616053089742378-0.61606063988362） |
| 2035 | 1.31623200576341（1.31622047652724-1.31624353499958） | 1.98859179468932（1.98857310269007-1.98861048668857） | 0.617488548497874（0.617484357121785-0.617492739873963） |
| 2036 | 1.3035627278828（1.30355015497262-1.30357530079298） | 1.95483064663248（1.95481041904037-1.95485087422459） | 0.618874341329334（0.618869717739467-0.618878964919202） |
| 2037 | 1.28842472737049（1.28841111897297-1.28843833576801） | 1.91491994603708（1.91489825245056-1.9149416396236） | 0.620394804994557（0.620389731457518-0.620399878531596） |
| 2038 | 1.27273620932256（1.27272156341204-1.27275085523308） | 1.87279455343462（1.87277144313084-1.8728176637384） | 0.622226031364217（0.622220489057186-0.622231573671248） |
| 2039 | 1.25802048421162（1.25800478502134-1.2580361834019） | 1.8312288910552（1.83120439061094-1.83125339149946） | 0.62464491510151（0.624638882287287-0.624650947915733） |
| 2040 | 1.24564920437956（1.24563241695233-1.24566599180679） | 1.79263682488098（1.79261092923599-1.79266272052597） | 0.627903136018772（0.627896587075941-0.627909684961603） |
| 2041 | 1.23604619011863（1.23602826647212-1.23606411376514） | 1.75792205648226（1.75789473884887-1.75794937411565） | 0.632092309050279（0.632085215030506-0.632099403070052） |
| 2042 | 1.22864685525889（1.22862774653218-1.2286659639856） | 1.7264896547202（1.72646088555378-1.72651842388662） | 0.637115336425506（0.637107666753225-0.637123006097787） |
| 2043 | 1.22316402311882（1.22314368082237-1.22318436541527） | 1.69842688424593（1.69839662708093-1.69845714141093） | 0.642834732046911（0.642826455946725-0.642843008147096） |
| 2044 | 1.21907913790154（1.21905751812303-1.21910075768005） | 1.67267101875188（1.67263924966685-1.67270278783691） | 0.649180822679505（0.649171908408278-0.649189736950732） |
| 2045 | 1.21598821415385（1.21596527643422-1.21601115187348） | 1.64820332039926（1.64817003010137-1.64823661069715） | 0.656116421016127（0.656106835295153-0.656126006737101） |
| 2046 | 1.21349460800106（1.21347031555325-1.21351890044887） | 1.6241686056763（1.62413379882452-1.62420341252808） | 0.663569684850675（0.663559393168271-0.663579976533079） |
| 2047 | 1.21125473148108（1.21122905096483-1.21128041199733） | 1.60030203286566（1.6002657178104-1.60033834792092） | 0.671392059075304（0.671381026963246-0.671403091187362） |
| 2048 | 1.20921811352601（1.20919101235579-1.20924521469623） | 1.5771386567215（1.57710083070242-1.57717648274058） | 0.679418636418551（0.679406830647726-0.679430442189376） |
| 2049 | 1.20745499013228（1.20742643325362-1.20748354701094） | 1.55485048733474（1.55481114193967-1.55488983272981） | 0.687594020355452（0.687581407369177-0.687606633341727） |
| 2050 | 1.20602492448668（1.20599487350705-1.20605497546631） | 1.53342429370028（1.53338341777696-1.5334651696236） | 0.695910010607675（0.695896555641331-0.695923465574019） |

ASMR, age-standardized mortality rate.

**Table S4.** Projection of the ASDR in overall, male, and female early-onset liver cancer by different ages from 2022 to 2050.

| **year** | **ASDR** | | |
| --- | --- | --- | --- |
| **Overall** | **Male** | **Female** |
| 2022 | 68.4445483424552（68.4445108734436-68.4445858114668） | 106.442361628295（106.442298133621-106.442425122969） | 30.9343638112951（30.9343488741511-30.9343787484391） |
| 2023 | 67.8406193756058（67.8405618934748-67.8406768577368） | 105.423918052843（105.423821234708-105.424014870978） | 30.8115566597478（30.8115347342201-30.8115785852755） |
| 2024 | 67.437642383769（67.4375593308139-67.4377254367242） | 104.71426644247（104.714126983648-104.714405901293） | 30.7499437453815（30.7499128103506-30.7499746804124） |
| 2025 | 67.10435232287（67.10423972009-67.10446492565） | 104.080072808569（104.079884147104-104.080261470034） | 30.7313016317543（30.731260162146-30.7313431013626） |
| 2026 | 66.8180490256038（66.8179034684455-66.8181945827621） | 103.501114455878（103.500871033701-103.501357878055） | 30.7459272078828（30.7458738730184-30.7459805427472） |
| 2027 | 66.6781914412914（66.6780094039003-66.6783734786825） | 103.190924685032（103.190620607017-103.191228763047） | 30.7968448047552（30.7967783308521-30.7969112786583） |
| 2028 | 66.6899908038751（66.6897691180045-66.6902124897457） | 103.133031984981（103.132662015628-103.133401954334） | 30.8894508334172（30.8893700673489-30.8895315994855） |
| 2029 | 66.7460496804892（66.745785674928-66.7463136860504） | 103.099975847151（103.099535831875-103.100415862427） | 31.0120922597981（31.0119961282768-31.0121883913194） |
| 2030 | 66.7571192759285（66.7568107747663-66.7574277770907） | 102.919512883732（102.918999771923-102.920025995541） | 31.1506421799408（31.1505296597085-31.1507547001731） |
| 2031 | 66.7069288948272（66.7065738910996-66.7072838985548） | 102.569225600348（102.5686367874-102.569814413296） | 31.2986220368341（31.2984921011182-31.29875197255） |
| 2032 | 66.6441853091915（66.6437815276441-66.6445890907389） | 102.159330411716（102.15866279962-102.159998023812） | 31.4550588898697（31.4549104788667-31.4552073008727） |
| 2033 | 66.5550768306241（66.5546224240837-66.5555312371645） | 101.653788223155（101.653039691108-101.654536755202） | 31.6153524532959（31.6151845902245-31.6155203163673） |
| 2034 | 66.355860371064（66.3553543909312-66.3563663511968） | 100.891821995693（100.890992364628-100.892651626758） | 31.7665296974373（31.7663415170162-31.7667178778584） |
| 2035 | 65.9947362235436（65.9941785247259-65.9952939223613） | 99.7594625684202（99.7585535770786-99.7603715597618） | 31.905570101876（31.9053607855647-31.9057794181873） |
| 2036 | 65.4635152649365（65.4629061594297-65.4641243704433） | 98.2202013399568（98.2192160953054-98.2211865846082） | 32.0385410099361（32.0383096960839-32.0387723237883） |
| 2037 | 64.8305633488209（64.8299028020237-64.8312238956181） | 96.411354746451（96.4102958826612-96.4124136102408） | 32.17662316701（32.1763688842819-32.1768774497381） |
| 2038 | 64.1823616131259（64.1816491435459-64.1830740827059） | 94.5215764096468（94.5204455719734-94.5227072473202） | 32.330330174936（32.3300518942997-32.3306084555723） |
| 2039 | 63.5822416510266（63.5814762301705-63.5830070718827） | 92.6710342259226（92.6698321109946-92.6722363408506） | 32.5135546175893（32.5132511710008-32.5138580641778） |
| 2040 | 63.098710734676（63.097890400343-63.099531069009） | 90.9877789991495（90.9865046192652-90.9890533790338） | 32.7402587564264（32.7399287709583-32.7405887418945） |
| 2041 | 62.7517847098651（62.7509068638799-62.7526625558503） | 89.5164846531499（89.5151358672263-89.5178334390735） | 33.0140062894116（33.0136482277399-33.0143643510833） |
| 2042 | 62.5064952371789（62.5055573062739-62.5074331680839） | 88.2091649251067（88.20773961154-88.2105902386734） | 33.3261899498399（33.3258022233963-33.3265776762835） |
| 2043 | 62.337160490421（62.3361601394538-62.3381608413882） | 87.0473017375674（87.0457978692386-87.0488056058962） | 33.6664293449607（33.6660104159708-33.6668482739506） |
| 2044 | 62.2150931919841（62.2140284226683-62.2161579612999） | 85.9614941165556（85.9599106716563-85.9630775614549） | 34.0312525246116（34.030800831149-34.0317042180743） |
| 2045 | 62.1268657868994（62.1257347131143-62.1279968606845） | 84.9043418585084（84.9026785861311-84.9060051308857） | 34.4207024182234（34.420216315214-34.4211885212328） |
| 2046 | 62.0589752266265（62.0577760435937-62.0601744096593） | 83.8425770915081（83.8408342930074-83.8443198900088） | 34.8325460430117（34.8320238104749-34.8330682755485） |
| 2047 | 61.996881478853（61.9956124848814-61.9981504728246） | 82.7733461760238（82.7715241106944-82.7751682413532） | 35.2583372057663（35.2577771387856-35.258897272747） |
| 2048 | 61.9419022188105（61.9405617137155-61.9432427239055） | 81.7455530001122（81.7436509893533-81.7474550108711） | 35.6876817361991（35.6870822466806-35.6882812257176） |
| 2049 | 61.9030917296281（61.9016778000883-61.9045056591679） | 80.7762861552733（80.7743030581632-80.7782692523834） | 36.120643354413（36.1200028148676-36.1212838939584） |
| 2050 | 61.887547775455（61.8860582482959-61.889037302614） | 79.8706390803025（79.8685734293702-79.8727047312348） | 36.5598248068332（36.5591414886115-36.5605081250549） |

ASDR, age-standardized DALYs rate; DALYs, the disability-adjusted life years.
